# Supplementary material
Source: publisher figshare collection journal article supplement (https://sage.figshare.com/ndownloader/files/10969667)
Supplement: Supplementary file 1 [file 10969667]

Wikoff et al., Role of Risk of Bias in Systematic Review for Chemical Risk Assessment: A Case Study in Understanding the Relationship Between Congenital Heart Defects (CHDs) and Exposures to Trichloroethylene (TCE)

**Supplemental Materials:**

**Refinements\* to OHAT RoB tool for TCE-CHD: Experimental Animal Studies**

| <i>RoB Question</i>                                                                                                    | <i>Interpretation (animal studies only)</i>                                                                                                                                                                                                                                                                                                                                                                                                                                                                                                                                                                                                                                                                                                                                                                                        |
|------------------------------------------------------------------------------------------------------------------------|------------------------------------------------------------------------------------------------------------------------------------------------------------------------------------------------------------------------------------------------------------------------------------------------------------------------------------------------------------------------------------------------------------------------------------------------------------------------------------------------------------------------------------------------------------------------------------------------------------------------------------------------------------------------------------------------------------------------------------------------------------------------------------------------------------------------------------|
| <b>Q1a</b> Was administered dose or exposure level adequately randomized?                                              | <b>Definitely Low</b> - explicitly report randomization method.<br><b>Probably Low</b> - explicitly report randomization, but not method.<br><b>Probably High</b> - no information on randomization reported, or suggestion of non-randomization.<br><b>Definitely High</b> - explicitly report non-randomization.                                                                                                                                                                                                                                                                                                                                                                                                                                                                                                                 |
| <b>Q1b</b> Were control and dose groups run concurrently?                                                              | <b>Definitely Low</b> - explicitly report concurrent administration of control/treatment groups.<br><b>Probably Low</b> - indirect evidence that the study used a concurrent control; OR concurrent administration assumed if authors did not report non-concurrent administration for control and treatment groups.<br><b>Probably High</b> - Indirect evidence that there was a lack of concurrent control group.<br><b>Definitely High</b> - there is direct evidence that there was a lack of a concurrent control group.                                                                                                                                                                                                                                                                                                      |
| <b>Q5a</b> Were experimental conditions identical across study groups – same vehicles?                                 | <b>Definitely Low</b> - direct evidence that same vehicle used in control and experimental animals.<br><b>Probably Low</b> - indirect evidence that same vehicle used in control and experimental animals.<br><b>Probably High</b> - indirect evidence that vehicle differed between control and experimental animals; OR authors did not report the vehicle used.<br><b>Definitely High</b> - direct evidence that vehicle differed between control and experimental animals.                                                                                                                                                                                                                                                                                                                                                     |
| <b>Q5b</b> Were experimental conditions identical across study groups – non-treatment-related experimental conditions? | <b>Definitely Low</b> - direct evidence that non-treatment-related experimental conditions were identical across study groups.<br><b>Probably Low</b> - identical non-treatment-related experimental conditions are assumed if author did not report differences in animal housing or husbandry.<br><b>Probably High</b> - indirect evidence that non-treatment-related experimental conditions were not comparable between study groups.<br><b>Definitely High</b> - direct evidence that non-treatment-related experimental conditions were not comparable between study groups.                                                                                                                                                                                                                                                 |
| <b>Q7</b> Were outcome data complete without attrition or exclusion from analysis?                                     | <b>Definitely Low</b> - direct evidence that loss of animals was adequately addressed and reasons were documented when animals were removed from a study; OR there is direct evidence that no animals died or were removed from the study due to toxicity.<br><b>Probably Low</b> - indirect evidence that loss of animals was adequately addressed and reasons were documented when animals were removed from a study; OR there is indirect evidence that no animals died or were removed from the study due to toxicity.<br><b>Probably High</b> - indirect evidence that loss of animals was unacceptably large and/or not adequately addressed; OR insufficient evidence provided about loss of animals.<br><b>Definitely High</b> - direct evidence that loss of animals was unacceptably large and not adequately addressed. |
| <b>Q8a</b> Can we be confident in the exposure characterization? – Test article purity                                 | <b>Definitely Low</b> - direct evidence purity confirmed generally $\geq 99\%$ for single or mixed substance.<br><b>Probably Low</b> - indirect evidence purity confirmed generally $\geq 99\%$ for single or mixed substance (chemical supplier documents purity of chemical), or $\geq 98\%$ for single substance with expectation that 2% impurities would not bias results.<br><b>Probably High</b> - authors did not report chemical purity (NR - insufficient information)<br><b>Definitely High</b> - there is direct evidence that purity was $<98\%$ for single substance, and/or impurities would be expected to bias results                                                                                                                                                                                            |
| <b>Q8b</b> Can we be confident in the exposure characterization? – test agent solution concentration and stability     | <b>Definitely Low</b> - direct evidence that exposures were quantitatively characterized prior to and/or during administration (i.e., authors report test agent solution concentrations and/or stability assessed, and method used).<br><b>Probably Low</b> - indirect evidence that exposures were quantitatively characterized prior to and/or during administration (i.e., authors report test agent solution concentrations and/or stability assessed, and method used).<br><b>Probably High</b> - indirect evidence that exposures were quantitatively assessed using poorly validated methods; OR there is insufficient information on quantitative assessment (NR - insufficient information).<br><b>Definitely High</b> - direct evidence that exposures were quantitatively assessed using poorly validated methods.      |
| <b>Q8c</b> Can we be confident in the exposure characterization? – consistent administration                           | <b>Definitely Low</b> - direct evidence that exposure was consistently administered (i.e., with the same method and time-frame) across treatment groups [e.g., guideline study, daily dose administration times reported (oral gavage), exposure monitoring (inhalation and drinking water), or single animal housing (drinking water studies)].<br><b>Probably Low</b> - indirect evidence that exposure was consistently administered (i.e., with the same method and time-frame) across treatment groups.                                                                                                                                                                                                                                                                                                                       |

Wikoff et al., Role of Risk of Bias in Systematic Review for Chemical Risk Assessment: A Case Study in Understanding the Relationship Between Congenital Heart Defects (CHDs) and Exposures to Trichloroethylene (TCE)

|            |                                                                                       |                                                                                                                                                                                                                                                                                                                                                                                                                                                                                                                                                                                                                                                                                                                                                                                                                                                                                                                                                                                                                                                                                                                                            |
|------------|---------------------------------------------------------------------------------------|--------------------------------------------------------------------------------------------------------------------------------------------------------------------------------------------------------------------------------------------------------------------------------------------------------------------------------------------------------------------------------------------------------------------------------------------------------------------------------------------------------------------------------------------------------------------------------------------------------------------------------------------------------------------------------------------------------------------------------------------------------------------------------------------------------------------------------------------------------------------------------------------------------------------------------------------------------------------------------------------------------------------------------------------------------------------------------------------------------------------------------------------|
|            |                                                                                       | <p><b>Probably High</b> - indirect evidence that doses were not administered on a consistent basis between treatment groups (e.g., group housing in drinking water studies); OR there is insufficient information on administration consistency (NR - insufficient information).</p> <p><b>Definitely High</b> - direct evidence that doses were not administered on a consistent basis between treatment groups.</p>                                                                                                                                                                                                                                                                                                                                                                                                                                                                                                                                                                                                                                                                                                                      |
| <b>Q9a</b> | Can we be confident in the outcome assessment? – outcome assessment method            | <p><b>Definitely Low</b> - direct evidence that the outcome was assessed using well-established methods (e.g., the Staples method (1974) and the close variant published by Stuckhardt and Poppe (1984) are considered the gold standard method for identifying developmental defects).</p> <p><b>Probably Low</b> - indirect evidence that the outcome was assessed using acceptable methods (i.e., deemed valid and reliable but not "gold standard"; e.g., the Wilson (1965) method – an acceptable method commonly used to detect many cardiac defects – is cited in OECD (414) guideline).</p> <p><b>Probably High</b> - indirect evidence that the outcome assessment method is insensitive instrument; OR the method has not been in common use or validated; OR there is insufficient information on the outcome assessment method used related to relevant endpoint (NR).</p> <p><b>Definitely High</b> - direct evidence that the outcome assessment method is an insensitive instrument.</p>                                                                                                                                    |
| <b>Q9b</b> | Can we be confident in the outcome assessment? – outcome assessors adequately blinded | <p><b>Definitely Low</b> - direct evidence that the outcome assessors were adequately blinded to the study group.</p> <p><b>Probably Low</b> - indirect evidence that the outcome assessors were adequately blinded to the study group.</p> <p><b>Probably High</b> - indirect evidence that it was possible for the outcome assessors to infer the study group prior to reporting outcomes without sufficient quality control measures; OR there is insufficient information provided about blinding of outcome assessors.</p> <p><b>Definitely High</b> - direct evidence for lack of adequate blinding of outcome assessors.</p>                                                                                                                                                                                                                                                                                                                                                                                                                                                                                                        |
| <b>Q10</b> | Were all measured outcomes reported?                                                  | <p><b>Definitely Low</b> - direct evidence that all measured study outcomes (primary and secondary) outlined in the protocol, methods, abstract, and/or introduction (that are relevant for the evaluation) have been reported.</p> <p><b>Probably Low</b> - indirect evidence that all of the measured study outcomes (primary and secondary) outlined in the protocol, methods, abstract, and/or introduction (that are relevant for the evaluation) have been reported.</p> <p><b>Probably High</b> - indirect evidence that all of the measured study outcomes (primary and secondary) outlined in the protocol, methods, abstract, and/or introduction (that are relevant for the evaluation) have not been reported; OR there is insufficient information provided about selective outcome reporting.</p> <p><b>Definitely High</b> - direct evidence that all of the measured study outcomes (primary and secondary) outlined in the protocol, methods, abstract, and/or introduction (that are relevant for the evaluation) have not been reported.</p>                                                                            |
| <b>Q11</b> | Were appropriate statistical units evaluated and reported?                            | <p><b>Definitely Low</b> - developmental effects were evaluated on a per-litter basis, and were reported using a justified statistical significance of the outcome; OR developmental effects were evaluated on a per-litter basis, and there was direct evidence that no outcome effect was observed/reported (e.g., method includes heart defect evaluation, and the paper explicitly states no heart defects were observed).</p> <p><b>Probably Low</b> - developmental effects were evaluated on a per-litter basis, but were not reported using a justified statistical significance of the outcome; OR developmental effects were evaluated on a per-litter basis, and there was indirect evidence that no outcome effect was observed/reported (e.g., method includes heart defect evaluation, but heart defects not mentioned in paper b/c authors only reporting observed effects).</p> <p><b>Probably High</b> - There is insufficient information provided about statistical analysis of developmental effects.</p> <p><b>Definitely High</b> - The investigators evaluated developmental effects on a per-fetus basis only.</p> |

\*Per OHAT recommendations, investigators should tailor the domains to the specific research question. The table provides description of domains tailored to TCE-CHD evaluation; no refinements were made to domains not listed.
